# Supplementary material for: Sex Disparities in Thyroid Cancer: A SEER Population Study
Source: Research Square preprint supplement (doi:10.21203/rs.3.rs-794602/v1), 2021-08-12
Supplement: Supplementary file 1 [file 7315b23bd31cbecf0c971344.xlsx]

## Sheet: Sheet1
Table S1. Univariate and Multivariate Cox Regression Analyses of Overall Survival in the SEER Cohort
Characteristics	Variable	All-cause Death		Univariate Analysis		Multivariate Analysis
		Female	Male	HR a（95%CI）	P	HR a（95%CI）	P
Tumor Size	≤1cm	775（16795）	397（4062）	2.264（2.006-2.556）	<0.001	1.759（1.555-1.990）	<0.001
	>1cm	1359（24475）	1060（9126）	2.211（2.040-2.396）	<0.001	1.555（1.434-1.688）	<0.001
Race	black	206（3033）	99（661）	2.404（1.891-3.055）	<0.001	1.635（1.275-2.097）	<0.001
	white	1074（32930）	1217（11151）	2.282（2.120-2.457）	<0.001	1.630（1.512-1.757）	<0.001
	other	254（5307）	141（1376）	2.353（1.915-2.891）	<0.001	1.657（1.346-2.040）	<0.001
Age	<55	535（27290）	316（6944）	2.380（2.071-2.736）	<0.001	2.135（1.852-2.463）	<0.001
	≥55	1599（13980）	1141（6244）	1.727（1.601-1.864）	<0.001	1.500（1.389-1.620）	<0.001
Median Income	<$55,000	394（6429）	277（1944）	2.472（2.120-2.883）	<0.001	1.748（1.493-2.047）	<0.001
	≥$55，000	1740（34841）	1180（11244）	2.240（2.080-2.412）	<0.001	1.617（1.499-1.744）	<0.001
Surgery Performed	No	98（260）	86（169）	1.479（1.106-1.976）	0.008	1.225（0.916-1.639）	0.171
	Yes	2036（41010）	1371（13019）	2.253（2.104-2.413）	<0.001	1.650（1.539-1.768）	<0.001
Histology Recode /Pathological Type	Medullary	69（510）	26（379）	1.772（1.291-2.433）	<0.001	1.268（0.914-1.759）	0.155
	HCC b	102（827）	78（372）	1.823（1.358-2.449）	<0.001	1.398（1.032-1.893）	0.03
	Papillary	1253（26990）	851（8477）	2.304（2.112-2.513）	<0.001	1.678（1.536-1.833）	<0.001
	Pap with Fv c	556（10995）	329（3129）	2.213（1.931-2.536）	<0.001	1.682（1.465-1.932）	<0.001
	Fillicular	154（1948）	113（831）	1.816（1.425-2.315）	<0.001	1.257（0.977-1.617）	0.075
T Stage	Tx	4（35）	7（18）	3.839（1.115-13.220）	0.033	6.306（0.665-59.821）	0.109
	T0	10（54）	16（42）	2.394（1.083-5.292）	0.031	3.594（1.435-9.001）	0.006
	T1	1127（26039）	572（6474）	2.161（1.954-2.390）	<0.001	1.719（1.551-1.904）	<0.001
	T2	297（7140）	236（2547）	2.363（1.992-2.804）	<0.001	1.772（1.488-2.109）	<0.001
	T3	468（7031）	424（3549）	1.887（1.655-2.152）	<0.001	1.517（1.328-1.733）	<0.001
	T4	228（971）	202（558）	1.742（1.441-2.106）	<0.001	1.425（1.174-1.728）	<0.001
N Stage	Nx	52（1169）	38（353）	2.667（1.752-4.060）	<0.001	1.846（1.198-2.845）	0.005
	N0	1648（31438）	882（8461）	2.079（1,916-2.257）	<0.001	1.610（1.481-1.749）	<0.001
	N1	434（8663）	537（4374）	2.578（2.272-2.926）	<0.001	1.699（1.493-1.933）	<0.001
M Stage	Mx	27（291）	18（86）	2.388（1.315-4.336）	0.004	2.249（1.228-4.119）	0.009
	M0	1956（40594）	1287（12794）	2.212（2.062-2.373）	<0.001	1.641（1.527-1.762）	<0.001
	M1	151（385）	152（308）	1.410（1.125-1.767）	0.003	1.269（1.011-1.592）	0.04
Combined Summary Stage	Localized	1373（29701）	748（7898）	2.142（1.960-2.342）	<0.001	1.654（1.510-1.812）	<0.001
	Regional	515（10773）	483（4765）	2.235（1.974-2.530）	<0.001	1.791（1.578-2.033）	<0.001
	Distant	246（796）	226（525）	1.659（1.384-1.989）	<0.001	1.332（1.110-1.600）	0.002
a. males versus females
b. HCC: Hurthle cell carcinoma;
c. Pap with Fv: Papillary with follicular variant
Table S2. Univariate and Multivariate Cox Regression Analyses of Cancer-specific Survival in the SEER Cohort
Characteristics	Variable	Cancer-specific Death		Univariate Analysis		Multivariate Analysis
		Female	Male	HRa（95%CI）	P	HRa（95%CI）	P
Tumor Size	≤1cm	68（16795）	45（4062）	2.898（1.989-4.224）	<0.001	1.883（1.275-2.780）	0.001
	>1cm	385（24475）	333（9126）	2.425（2.094-2.808）	<0.001	1.375（1.182-1.599）	<0.001
Race	black	38（3033）	19（661）	2.456（1.416-4.260）	0.001	1.087（0.604-1.958）	0.78
	white	328（32930）	323（11151）	3.055（2.619-3.562）	<0.001	1.567（1.336-1.837）	<0.001
	other	87（5307）	36（1376）	1.733（1.175-2.557）	0.006	1.025（0.689-1.525）	0.902
Age	<55	89（27290）	91（6944）	4.121（3.077-5.520）	<0.001	2.630（1.954-3.541）	<0.001
	≥55	364(13980)	287(6244)	1.875（1.606-2.188)	<0.001	1.221（1.042-1.432）	0.014
Median Income	<$55,000	74（6429）	76（1944）	3.574（2.595-4.923）	<0.001	1.645（1.179-2.295）	0.003
	≥$55，000	379（34841）	302（11244）	2.600（2.235-3.025）	<0.001	1.422（1.219-1.660）	<0.001
Surgery Performed	No	50（260）	38（169）	1.256（0.823-1.917）	0.29	0.954（0.607-1.497）	0.836
	Yes	403（41010）	340（13019）	2.797（2.421-3.231）	<0.001	1.508（1.300-1.750）	<0.001
Histology Recode /Pathological Type	Medullary	35（510）	53（379）	2.146（1.400-3.289）	<0.001	1.128（0.724-1.758）	0.593
	HCCb	38（827）	32（372）	1.986（1.241-3.180）	0.004	1.183（0.713-1.961）	0.515
	Papillary	237（26990）	211（8477）	2.979（2.474-3.586）	<0.001	1.646（1.363-1.988）	<0.001
	Pap with Fvc	88（10995）	51（3129）	2.146（1.520-3.030）	<0.001	1.288（0.906-1.830）	0.158
	Fillicular	55（1948）	31（831）	1.392（0.896-2.161）	0.141	0.890（0.555-1.428）	0.63
T Stage	Tx	2（35）	5（18）	5.168（0.999-26.746）	0.05	16.956（0.581-494.632）	0.1
	T0	5（54）	4（42）	1.141（0.305-4.262）	0.845	3.234（0.445-23.502）	0.246
	T1	96（26039）	60（6474）	2.640（1.912-3.645）	<0.001	1.867（1.342-2.596）	<0.001
	T2	52（7140）	44（2547)	2.500（1.673-3.736）	<0.001	1.512（1.000-2.286）	0.05
	T3	148（7031）	137（3549）	1.923（1.524-2.426）	<0.001	1.245（0.978-1.586）	0.075
	T4	150（971）	128（558）	1.637（1.293-2.073）	<0.001	1.250（0.981-1.593）	0.071
N Stage	Nx	13（1169)	8（353）	2.231（0.922-5.401）	0.075	1.165（0.423-3.206）	0.768
	N0	240（31438）	140（8461）	2.251（1.827-2.772）	<0.001	1.593（1.289-1.968）	<0.001
	N1	200（8663）	230（4374）	2.385（1.973-2.883）	<0.001	1.339（1.103-1.627）	0.003
M Stage	Mx	7（291）	4（86）	2.033（0.595-6.946）	0.258	1.444（0.344-6.062）	0.616
	M0	332（40594）	259（12749）	2.601（2.211-3.060）	<0.001	1.513（1.281-1.787）	<0.001
	M1	114（385）	115（308）	1.400（1.080-1.815）	0.011	1.190（0.912-1.552）	0.2
Combined Summary Stage	Localized	127（29701）	77（7898）	2.375（1.790-3.153）	<0.001	1.569（1.172-2.099）	0.002
	Regional	148（10773）	143（4765）	2.296（1.824-2.889）	<0.001	1.635（1.293-2.067）	<0.001
	Distant	178（796）	158（525）	1.565（1.262-1.940）	<0.001	1.184（0.950-1.475）	0.133
a. males versus females
b. HCC: Hurthle cell carcinoma;
c. Pap with Fv: Papillary with follicular variant
