# Supplementary material for: Sex Disparities in Thyroid Cancer: A SEER Population Study
Source: Research Square preprint supplement (doi:10.21203/rs.3.rs-794602/v1), 2021-08-12
Supplement: Supplementary file 2 [file a2a0f36761d99ac3fd10ac11.xlsx]

## Sheet: Sheet1
Table S4. Baseline Characteristics of the Post-PSM Cohort
Characteristic	Variable	Female	Male	P
		（n=12779）	（n=12779）
Age	<55	6781(53.1)	6800(53.2)	0.812
	≥55	5998(46.9)	5979(46.8)
Race	White	10795(84.5)	10808(84.6)	0.76
	Black	653(5.1)	628(4.9)
	Other	1331(10.4)	1343(10.5)
Tumor Size	≤1.0cm	3963(31.0)	3991(31.2)	0.705
	>1.0cm	8816(69.0)	8788(68.8)
T Stage	Tx	4(<0.1)	14(0.1)	0.313
	T0	28(0.2)	26(0.2)
	T1	6339(49.6)	6368(49.8)
	T2	2469(19.3)	2451(19.2)
	T3	3416(26.7)	3410(26.7)
	T4	523(4.1)	510(4.0)
N Stage	Nx	307(2.4)	336(2.6)	0.489
	N0	8257(64.6)	8260(64.6)
	N1	4215(33.0)	4183(32.7)
M Stage	Mx	72(0.6)	81(0.6)	0.592
	M0	12487(97.7)	12463(97.5)
	M1	220(1.7)	235(1.8)
Combined Summary Stage	Localized	7666(60.0)	7697(60.2)	0.628
	Regional	4698(36.8)	4645(36.3)
	Distant	415(3.2)	437(3.4)
Surgery Performed	No	92(0.7)	92(0.7)	1
	Yes	12687(99.3)	12687(99.3)
Histology Recode	Medullary	223(1.7)	223(1.7)	1
/Pathological Type	Hurthle cell carcinoma	351(2.7)	351(2.7)
	Papillary	8367(65.5)	8367(65.5)
	Papillary with follicular variant	3113(24.4)	3113(24.4)
	Fillicular	725(5.7)	725(5.7)
Laterality	Bilateral	65(0.5)	78(0.6)	0.504
	Not paired Site	12714(99.5)	12701(99.4)
Median Income	< $35,000	37(0.3)	41(0.3)	0.918
	$35,000-$54,999	1832(14.3)	1828(14.3)
	$55,000-$74,999	5625(44.0)	5665(44.3)
	≥$75,000	5285(41.4)	5245(41.0)
All-cause Death	Alive	11897(93.1)	11430(89.4)	<0.001
	Dead	882(6.9)	1349(10.6)
Cancer-specific Death	Alive	12540(98.1)	12456(97.5)	<0.001
	Dead	239(1.9)	323(2.5)
Survival Months	Mean±SD	74.14±49.14	72.68±49.23	0.018
