# Supplementary material for: Sex Disparities in Thyroid Cancer: A SEER Population Study
Source: Research Square preprint supplement (doi:10.21203/rs.3.rs-794602/v1), 2021-08-12
Supplement: Supplementary file 3 [file a8890398d8acb9fd134cb6e2.xlsx]

## Sheet: Sheet1
Table S3. Sex Differences in Nodal Ratio
Sex	Regional Nodes Examined			Regional Nodes Positive			Nodal Ratio
	Mean	Range	Median	Mean	Range	Median	Mean± SD
Female(n=21825)	8.584	1-90	3	2.045	0-67	0	0.192±0.312
Male(n=7256)	13.408	1-90	5	4.013	0-65	1	0.297±0.351
